# Supplementary material for: Role of nitrogen and iron biogeochemical cycles on the production and export of dissolved organic matter in agricultural headwater catchments
Source: Copernicus journal article supplement (doi:10.5194/egusphere-2024-1212), 2024-04-30

# Does nitrate regulate dissolved organic matter mobilization and export in the riparian soils of an agricultural catchment?

Thibault Lambert<sup>1</sup>, Rémi Dupas<sup>1,\*</sup>, Patrick Durand<sup>1</sup>

<sup>1</sup> INRAE, UMR SAS 1069, L'Institut Agro, Rennes, France

\* Corresponding author

## Supplementary Information

**Figure S1** – A) Loadings of PARAFAC components identified in this study and B) results from the split half analysis.

A)

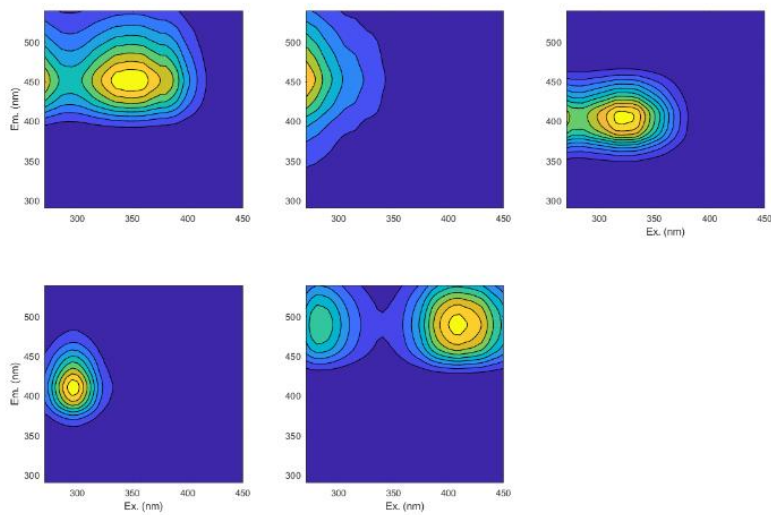

B)

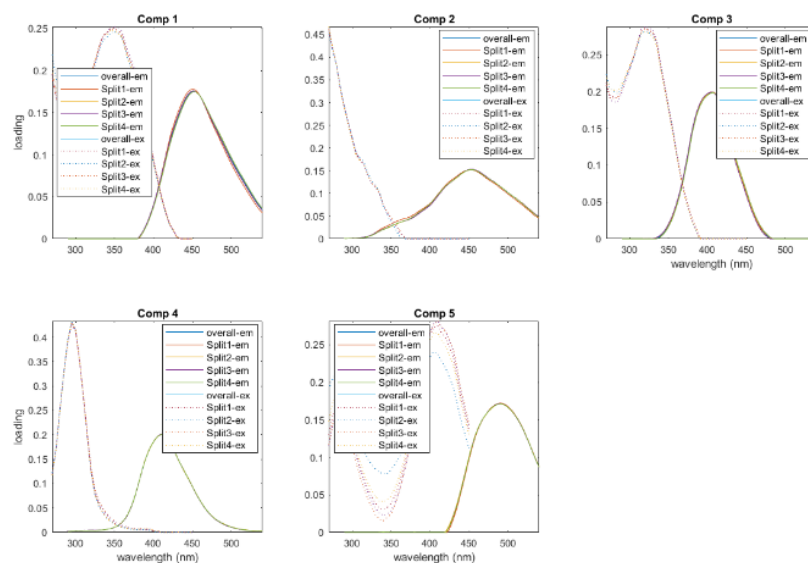

**Figure S2** – Long-term trends in dissolved organic carbon (DOC) concentrations measured in streams in Brittany over the 2007-2020 period based on public data. Trends were determined based on Mann-Kendall tests with a level of p-value of 0.05. Over 76 streams, 11 showed a positive increasing trend, 2 a negative trend, and the rest no significant evolution.

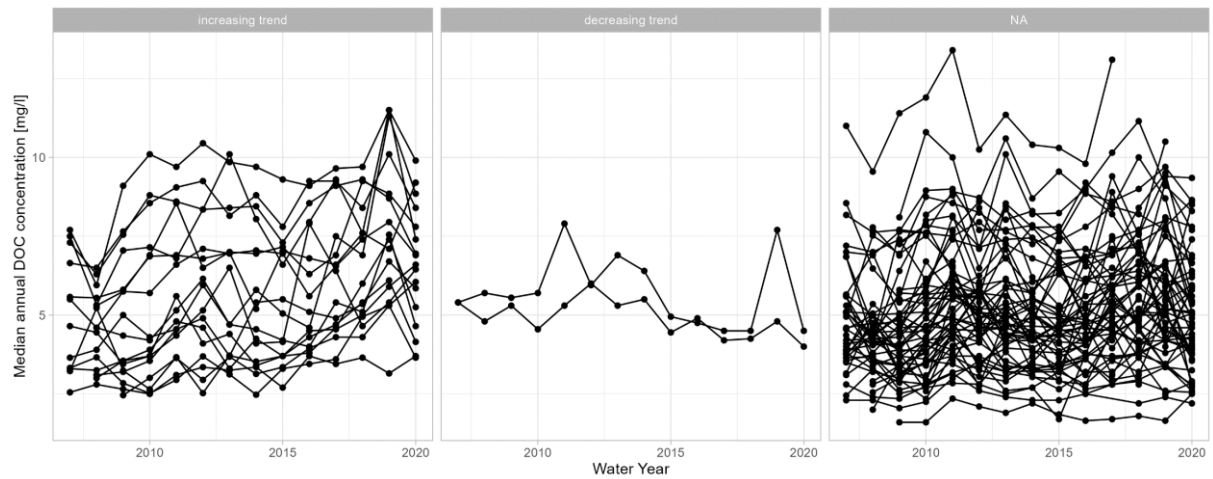

Supplement: Supplementary file 1 [file egusphere-2024-1212-supplement.pdf]
